# Supplementary material for: Artemis inhibition as a therapeutic strategy for acute lymphoblastic leukemia
Source: PubMed Central journal article supplement (PMC10111164; doi:10.3389/fcell.2023.1134121), 2023-03-31
Supplement: DataSheet1.pdf [file DataSheet1.pdf]

# Supplementary Figure 1

A

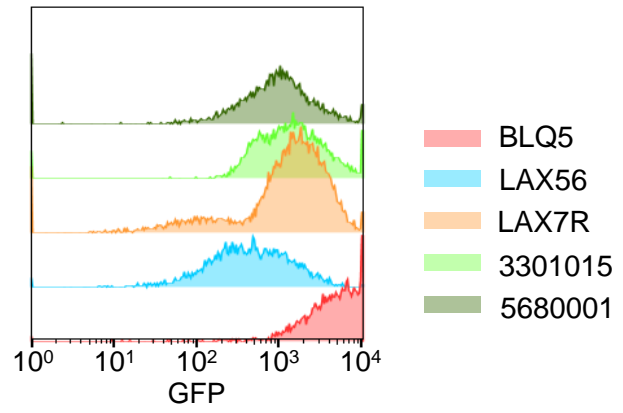

B

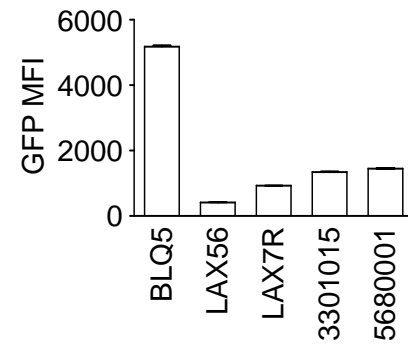

Supplementary Figure 2

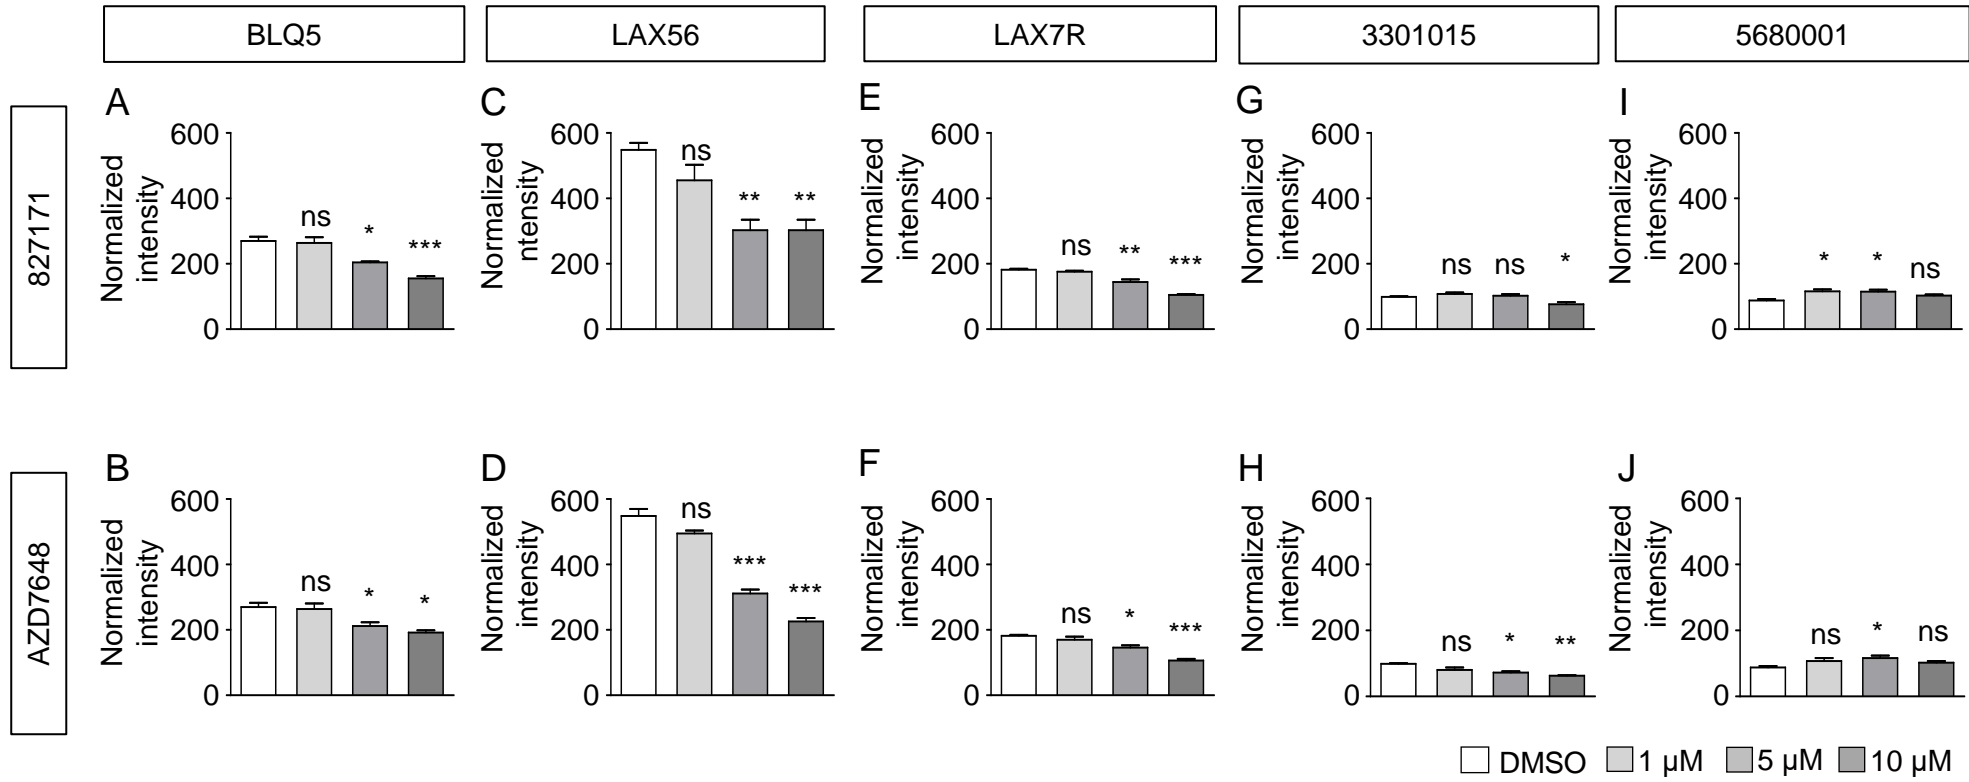

### Supplementary Figure 3

BLQ5

LAX56

LAX7R

3301015

5680001

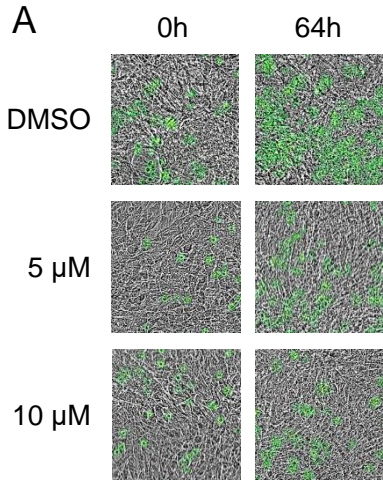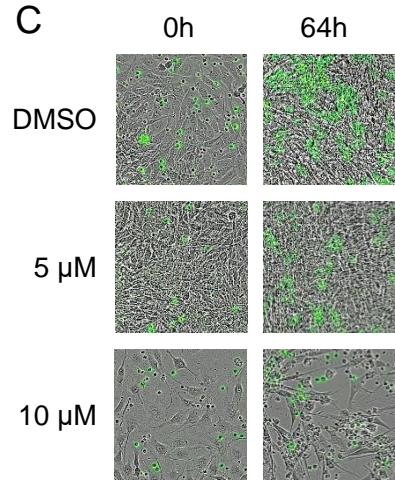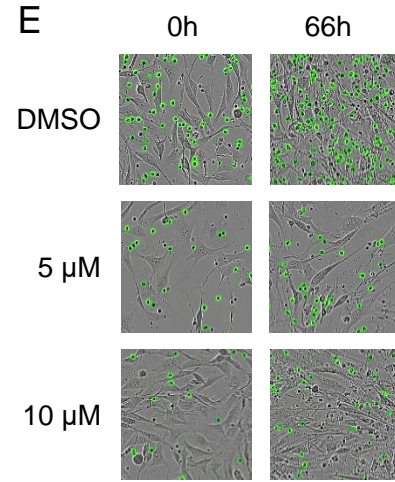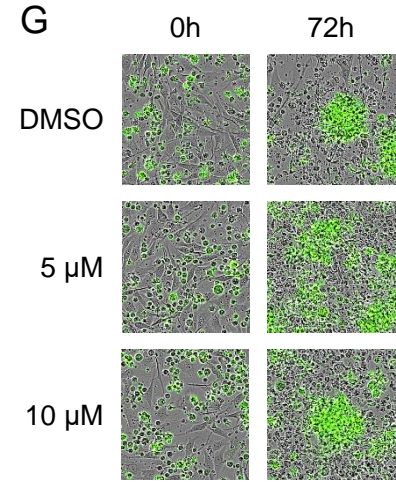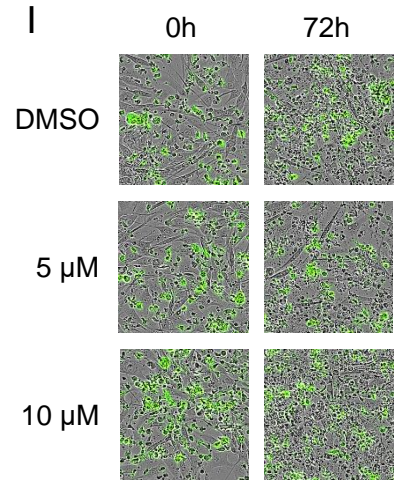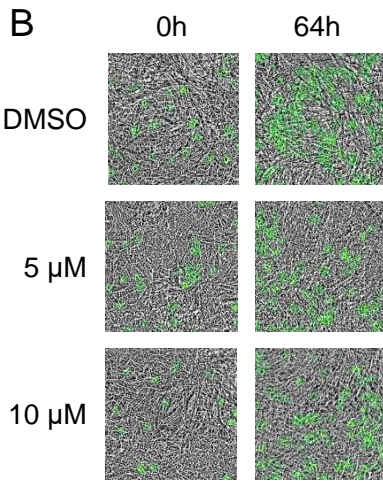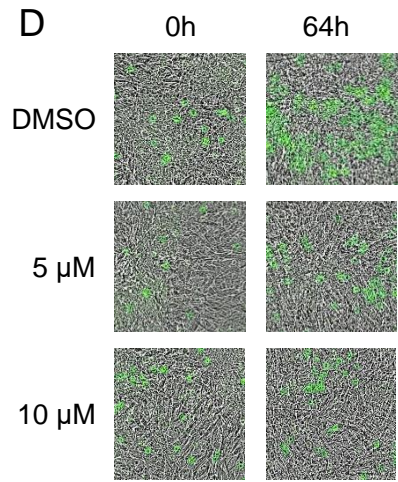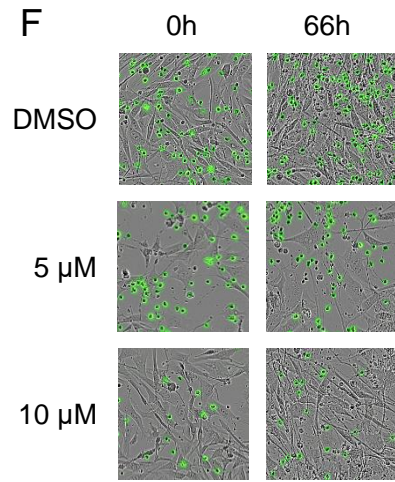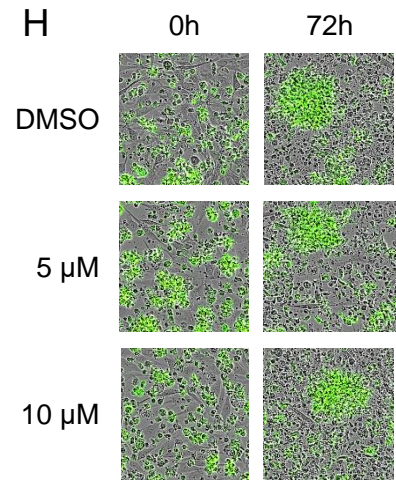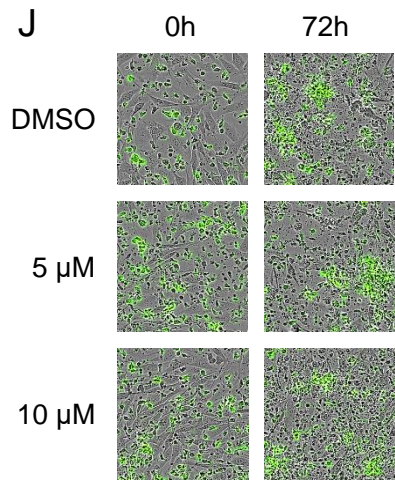

Scale bar  
(400  $\mu$ m)

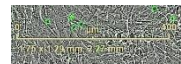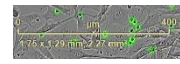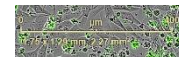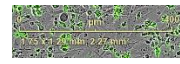

827171

AZD7648

## SUPPLEMENTARY MATERIAL

### Supplementary Figure Legends

**Supplementary Figure 1. The GFP expression per cell of the mature B cell lines is intermediate between the highest (BLQ5) and the lowest (LAX56) GFP-transduced cells.**

(A) GFP expression of representative DMSO-treated cells at the final time point for each cell line as detected by flow cytometry. B. Median fluorescence intensity (MFI) of GFP for DMSO-treated cells in triplicates for each cell line.

**Supplementary Figure 2. The Artemis inhibitor 827171 and DNA-PK inhibitor AZD7648 significantly inhibit proliferation of B-ALL and have minimal effect on mature B cells.** The

statistical analysis of proliferation differences is shown for the final time point measurements from Figure 5 H-J and Figure 6 H-I. Normalized intensity is shown for BLQ5 (A, B), LAX56 (C, D), LAX7R (E, F), 3301015 (G, H) or 5680001 (I, J) after treatment with 827171 or DNA-PK inhibitor AZD7648, respectively, at indicated doses compared to DMSO control. \* $p < 0.05$ ;

\*\* $p < 0.001$ ; \*\*\* $p < 0.0001$ , for statistically significant changes in proliferation of a treatment group compared to DMSO by one-way ANOVA.

**Supplementary Figure 3. Mature B cell lines grow in clusters while the B-ALL cells grow as single cells.** Representative images captured by the Incucyte of cell lines BLQ5 (A, B),

LAX56(C, D), LAX7R (E, F), 3301015 (G, H), and 5680001(I, J) treated with DMSO, 5  $\mu\text{M}$  or 10 $\mu\text{M}$  of 827171 (A, C, E, G, I, respectively) and AZD7648 (B, D, F, H, J, respectively) at 0 h and the final time point of each experiment. Scale bar denotes 400  $\mu\text{m}$ . The clustering reduces fluorescence intensity, but the cells are healthy, and the Incucyte fluorescence measurement does not decrease with treatment with 827171, in contrast to the treatment with AZD7648.
